# Supplementary material for: Temporal dynamics and developmental memory of 3D chromatin architecture at Hox gene loci
Source: eLife journal article supplement (doi:10.7554/elife.02557), 2014-04-29
Supplement: supp [file elife-02557-supp-v1.zip]

Archive with 11 entries (11 files):
- elife_poa_e02557_Figure_1_figure_supplement_4.pdf
- elife_poa_e02557_Figure_1_figure_supplement_5.pdf
- elife_poa_e02557_Figure_2_figure_supplement_1.pdf
- elife_poa_e02557_Figure_1_figure_supplement_2.pdf
- elife_poa_e02557_Figure_1_figure_supplement_1.pdf
- elife_poa_e02557_Figure_1_figure_supplement_6.pdf
- elife_poa_e02557_Figure_1_figure_supplement_7.pdf
- elife_poa_e02557_Figure_5_figure_supplement_1.pdf
- elife_poa_e02557_Figure_1_figure_supplement_3.pdf
- elife_poa_e02557_Figure_2_figure_supplement_2.pdf
- elife_poa_e02557_Figure_5_figure_supplement_2.pdf
