# Supplementary material for: Temporal dynamics and developmental memory of 3D chromatin architecture at Hox gene loci
Source: eLife journal article supplement (doi:10.7554/elife.02557), 2014-04-29

**A**

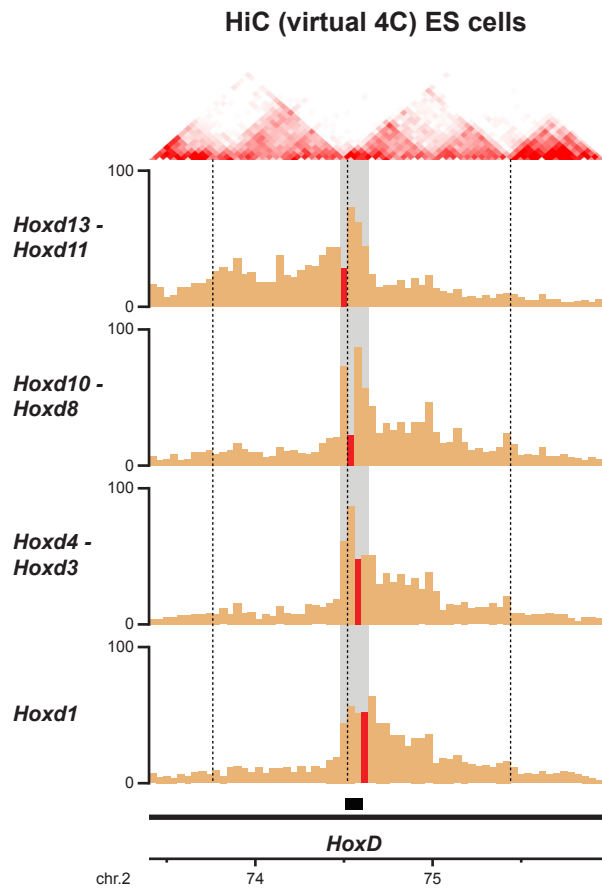

**B**

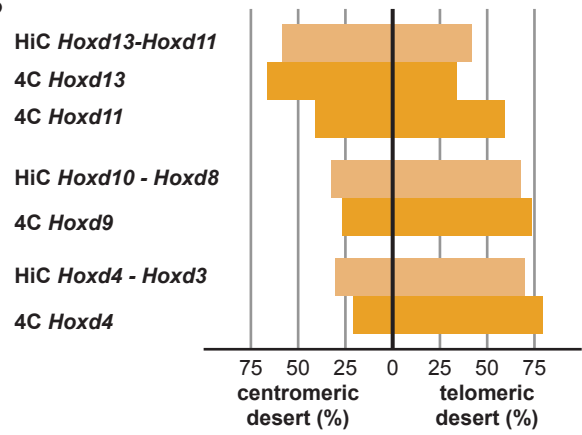

**C**

**TADs in ES cells (mm9, from Dixon *et al.*, 2012)**

|    |      |            |            |
|----|------|------------|------------|
| -2 | chr2 | 73'400'000 | 73'760'000 |
| -1 | chr2 | 73'760'000 | 74'520'000 |
| +1 | chr2 | 74'520'000 | 75'440'000 |
| +2 | chr2 | 75'440'000 | 75'960'000 |

**D**

**Position of HiC bins (viewpoints in virtual 4C, mm9)**

- TSS-based
- 40 kb resolution

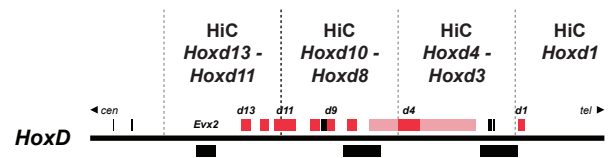

**E**

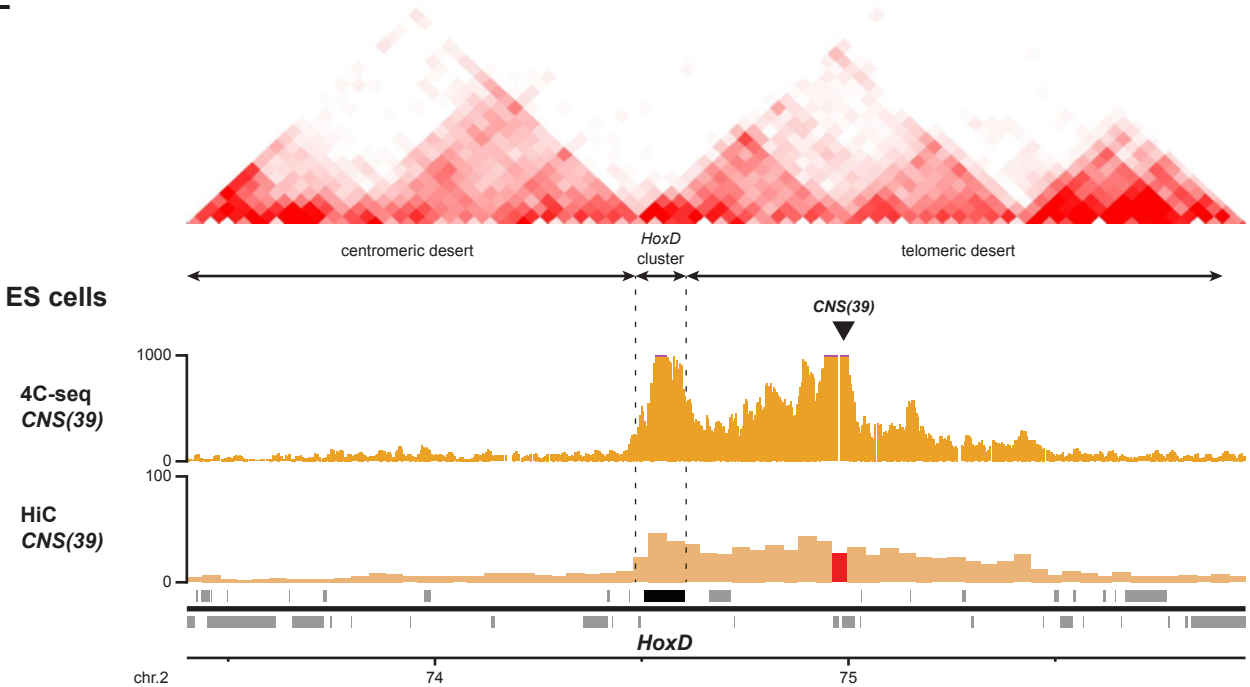

Supplement: supp [file elife-02557-supp-v1.zip › elife_poa_e02557_Figure_5_figure_supplement_2.pdf]
