# Supplementary figures and images for: Temporal dynamics and developmental memory of 3D chromatin architecture at Hox gene loci
Source: eLife journal article supplement (doi:10.7554/elife.02557), 2014-04-29

*Hoxd13*

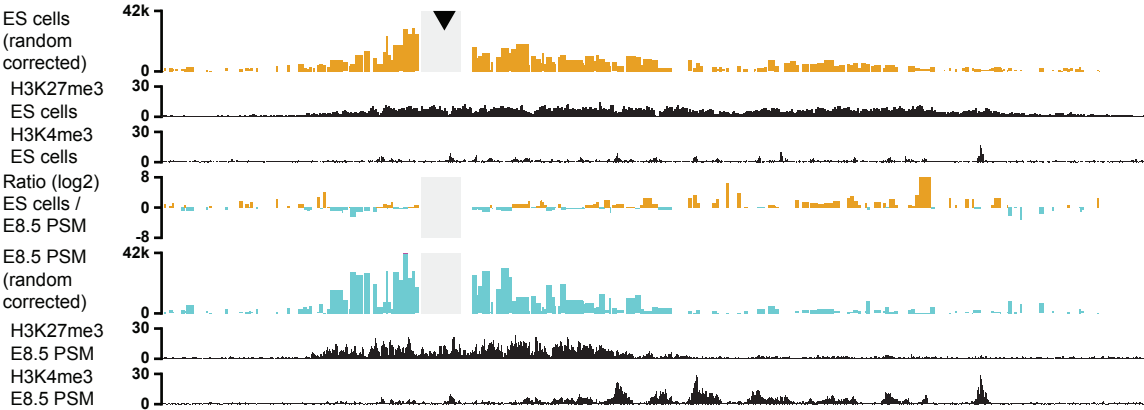

*Hoxd11*

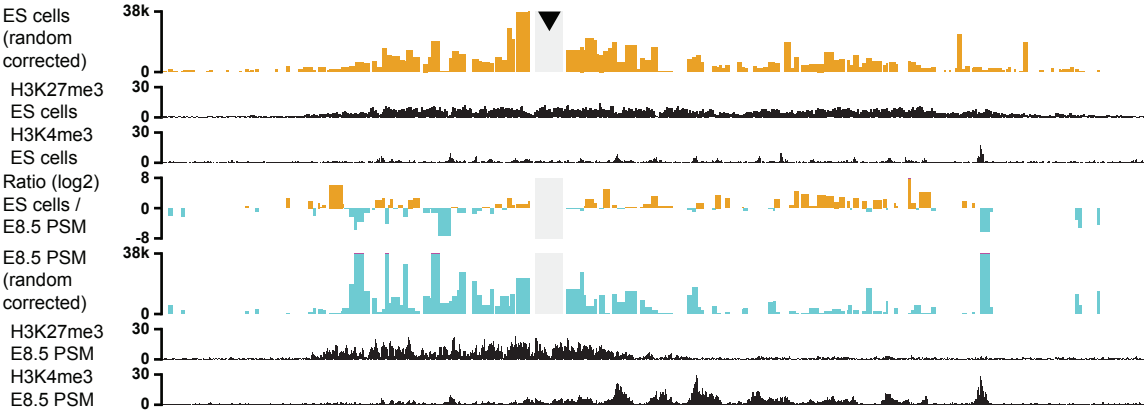

*Hoxd9*

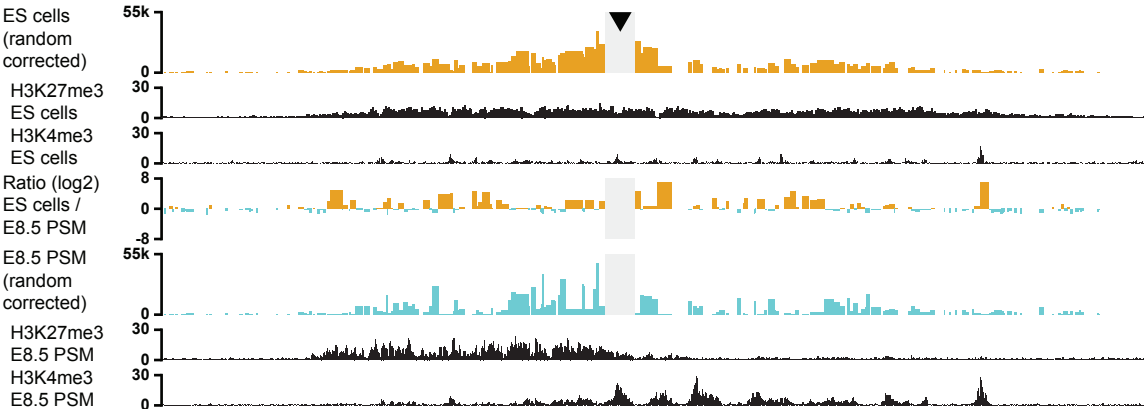

*Hoxd4*

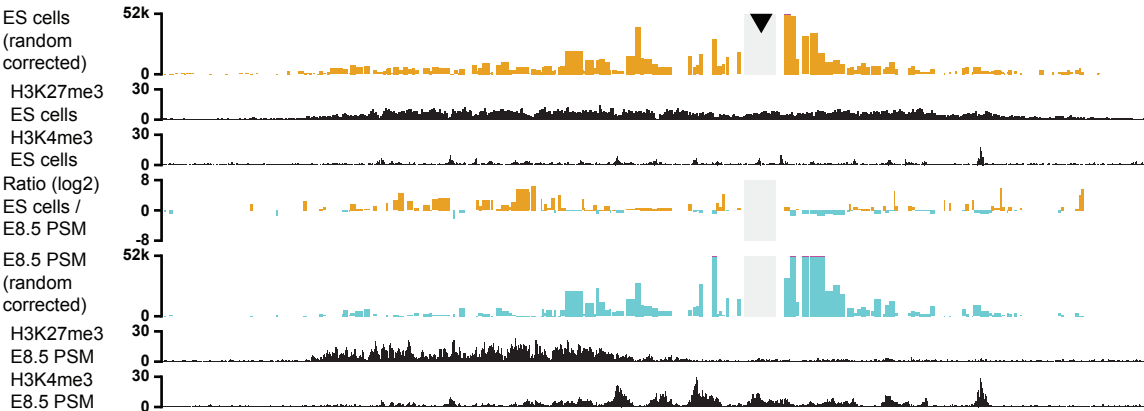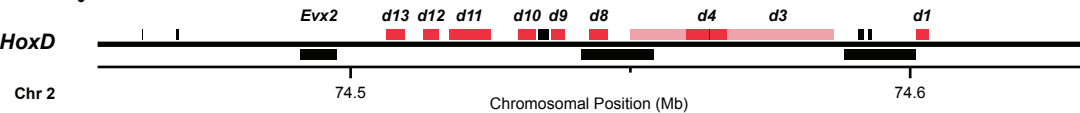

Supplement: supp [file elife-02557-supp-v1.zip]

### Hoxc13

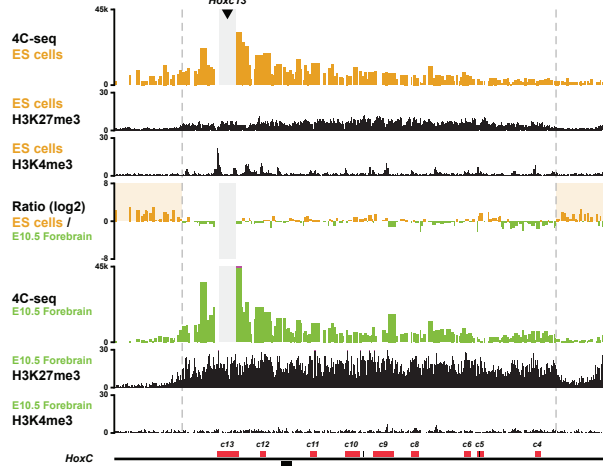

### Hoxa13

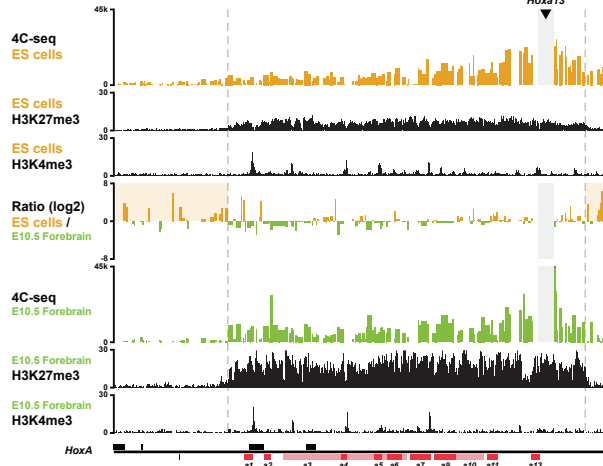

Supplement: supp [file elife-02557-supp-v1.zip › elife_poa_e02557_Figure_1_figure_supplement_4.pdf]

## C Ratio:

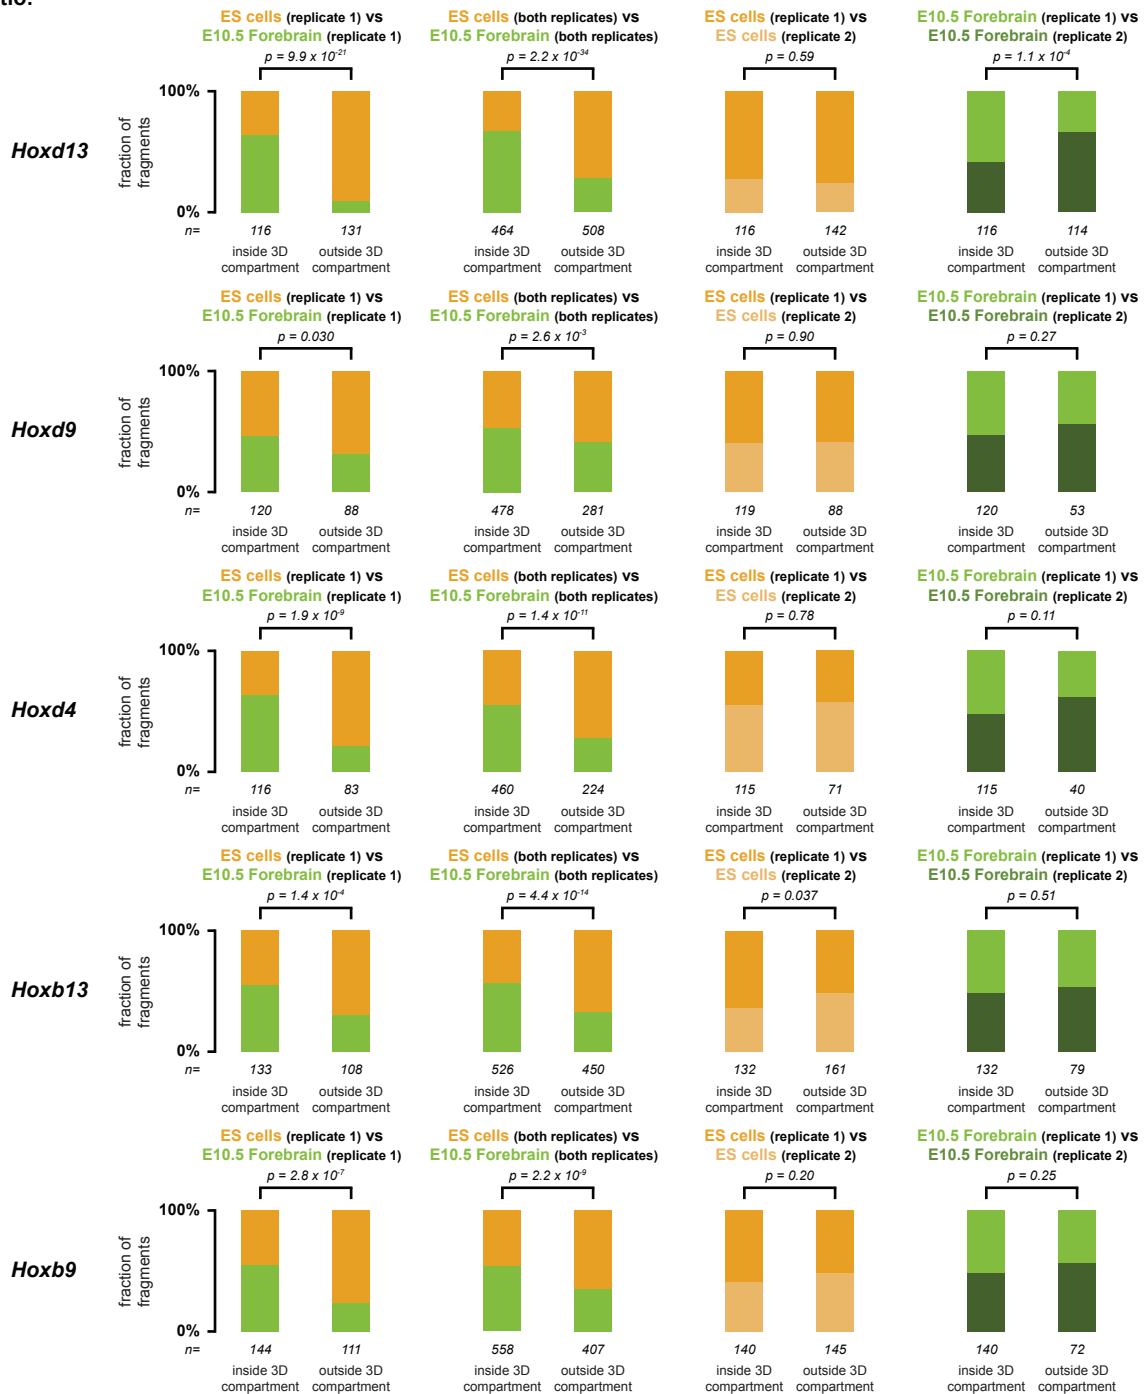

## D Ratio:

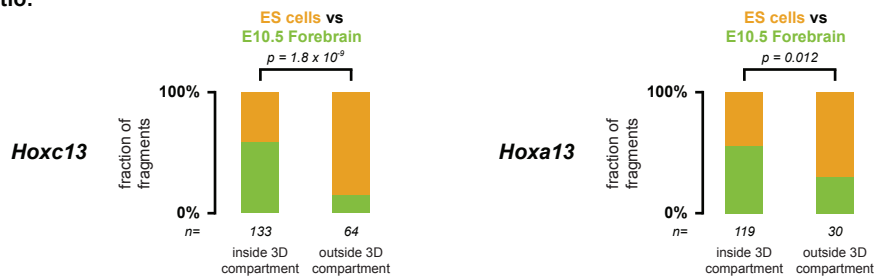

Supplement: supp [file elife-02557-supp-v1.zip › elife_poa_e02557_Figure_1_figure_supplement_5.pdf]

## Hoxd4

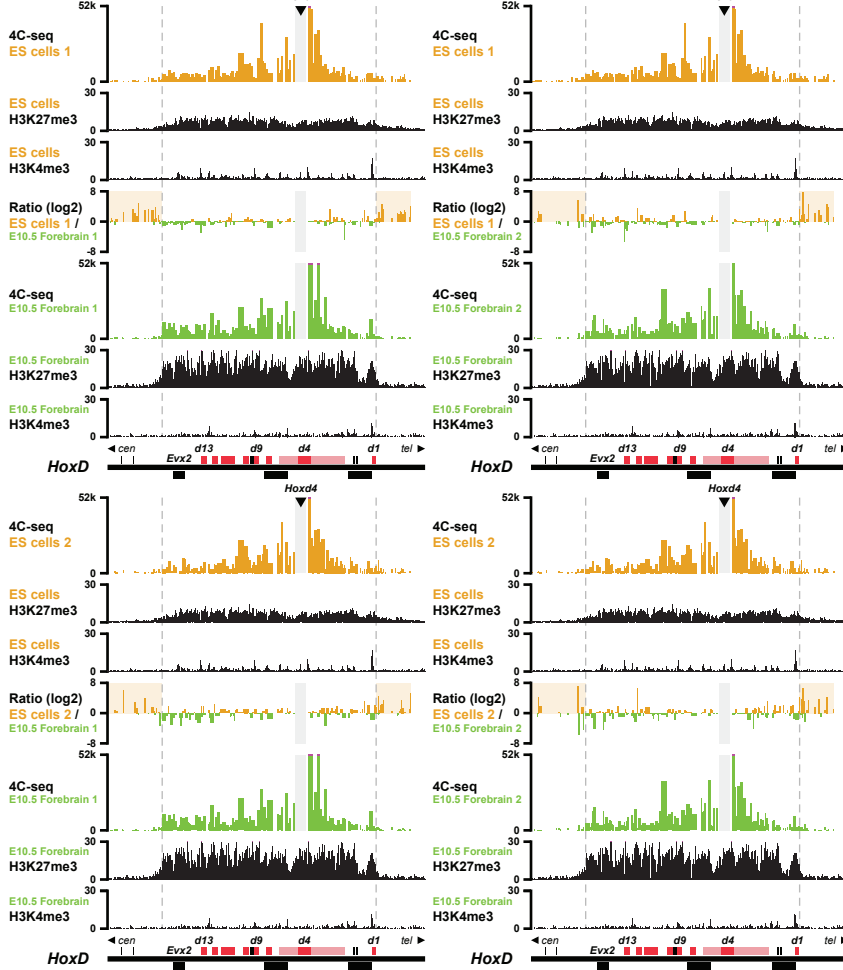

## Controls:

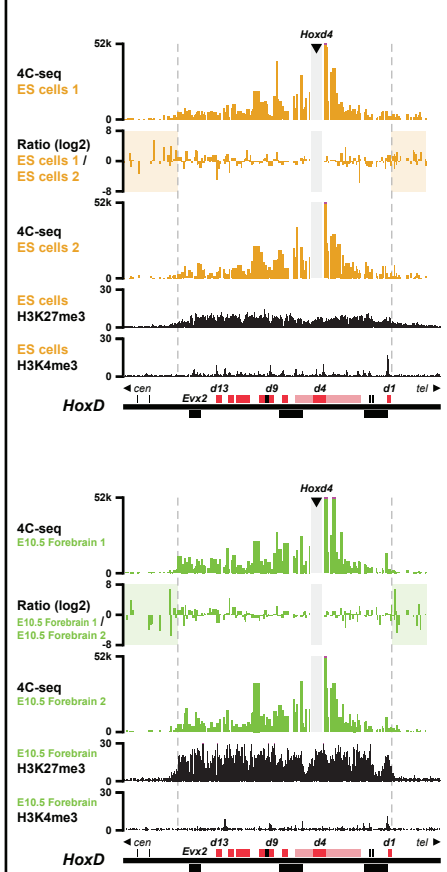

## Hoxb13

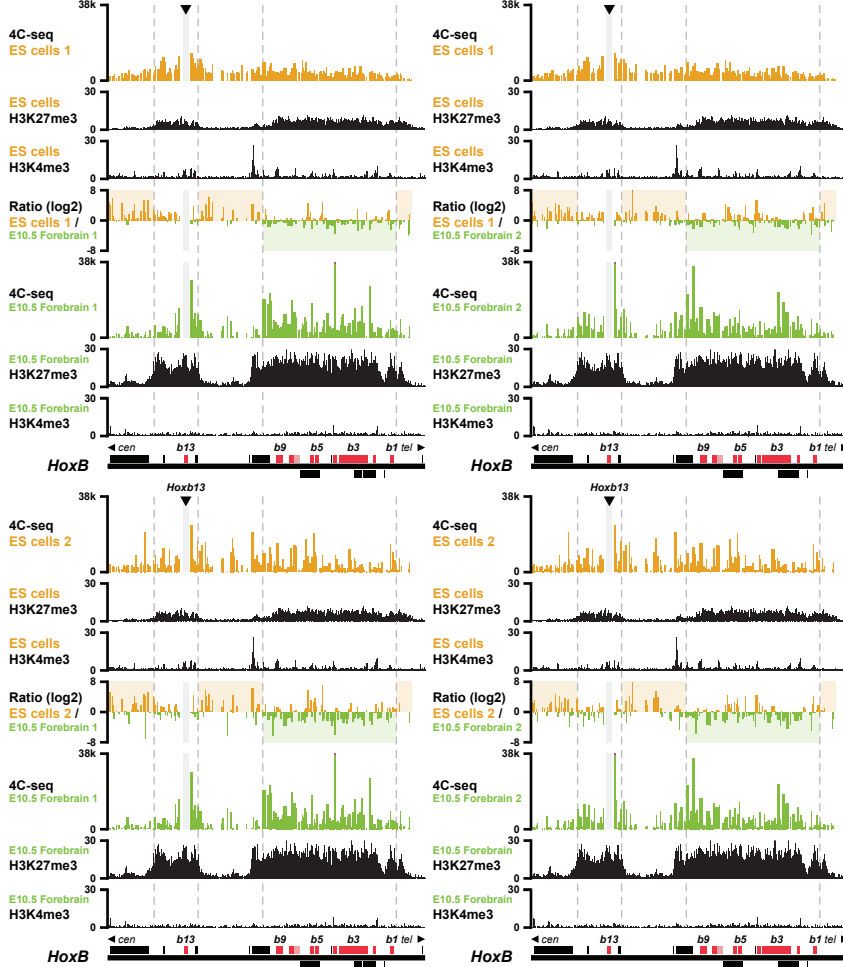

## Controls:

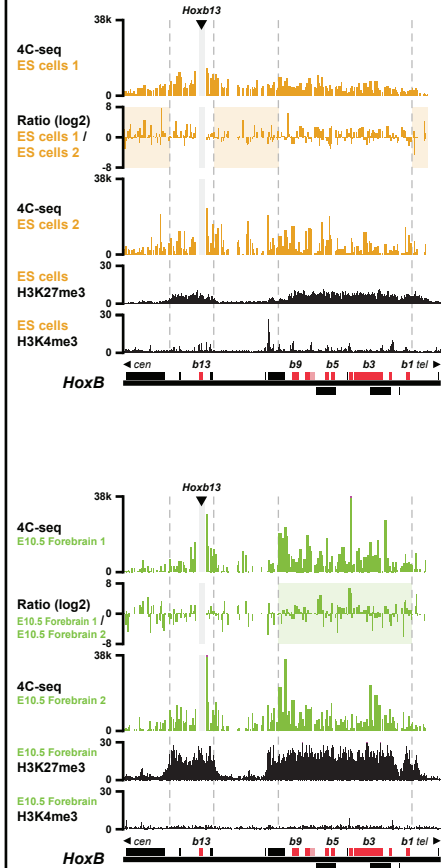

Supplement: supp [file elife-02557-supp-v1.zip › elife_poa_e02557_Figure_1_figure_supplement_2.pdf]

## Hoxd13

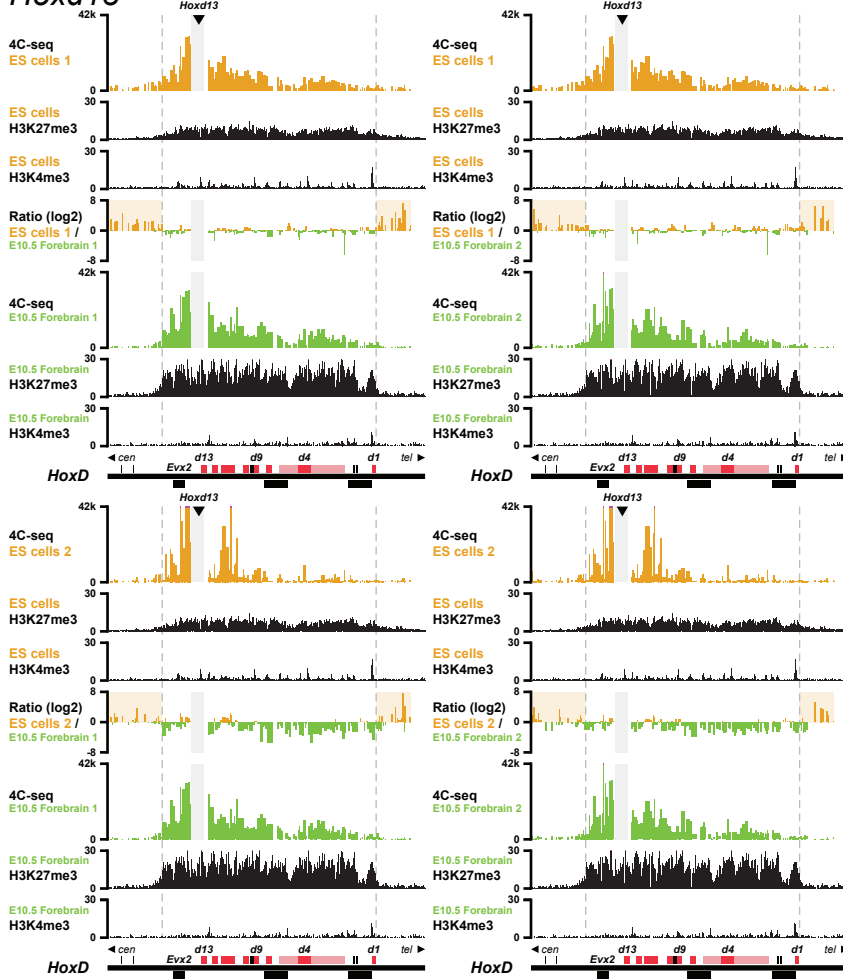

## Controls:

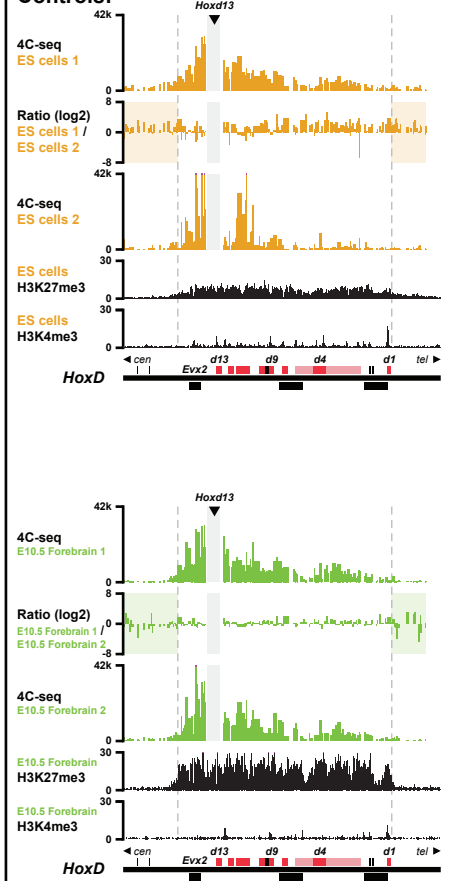

## Hoxd9

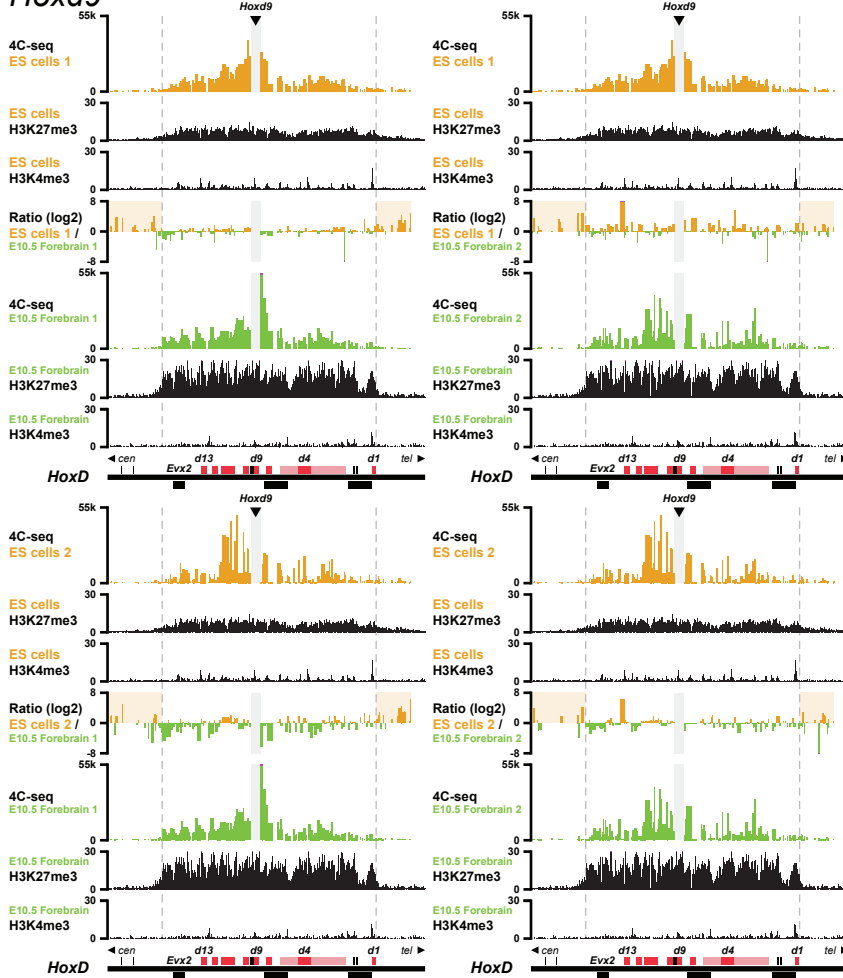

## Controls:

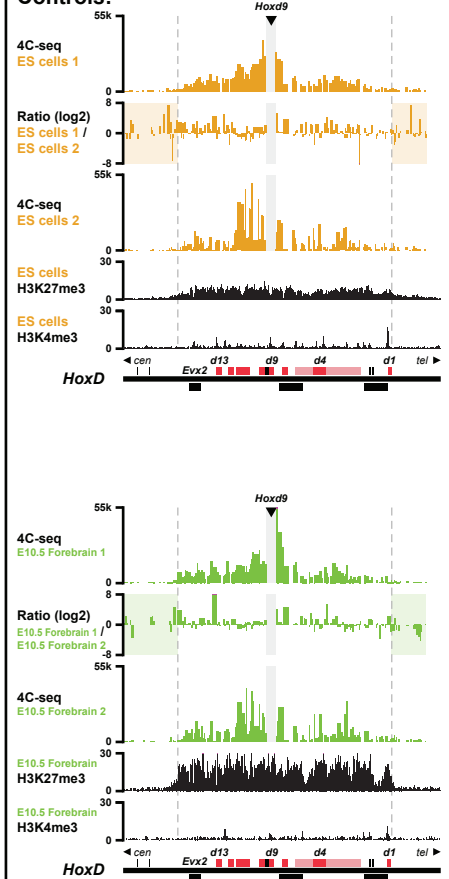

Supplement: supp [file elife-02557-supp-v1.zip › elife_poa_e02557_Figure_1_figure_supplement_1.pdf]

**A** *HoxD* cluster vs chromosome 2

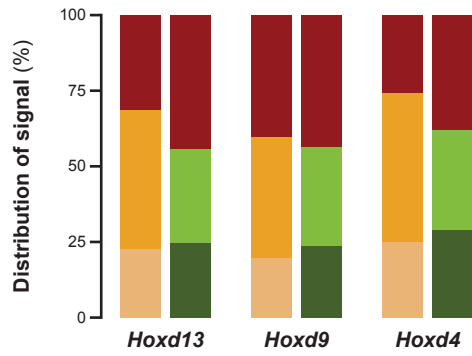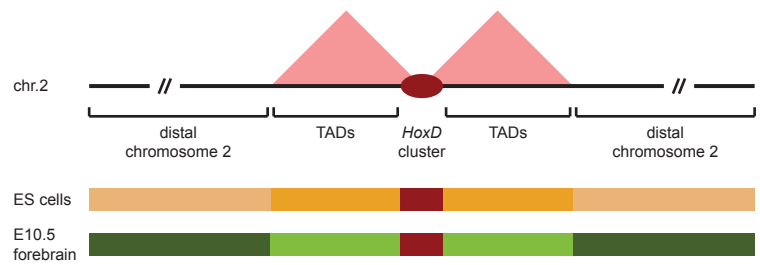

**B** *HoxB* cluster vs chromosome 11

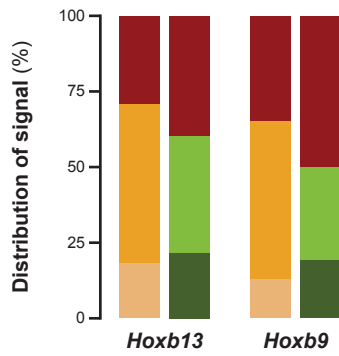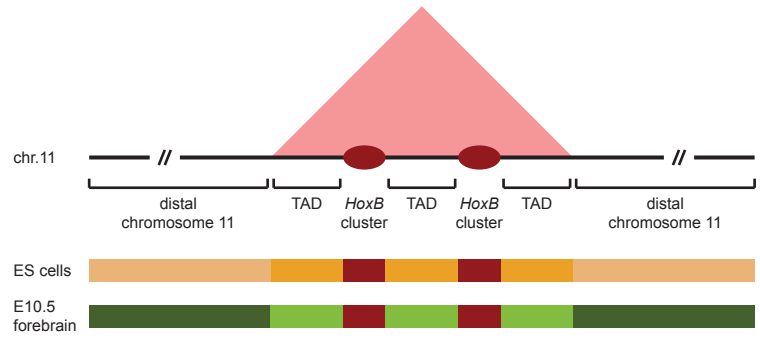

Supplement: supp [file elife-02557-supp-v1.zip › elife_poa_e02557_Figure_1_figure_supplement_6.pdf]

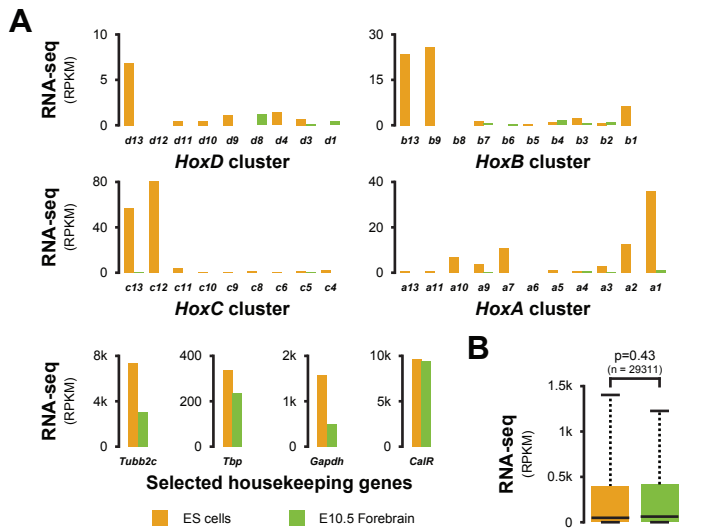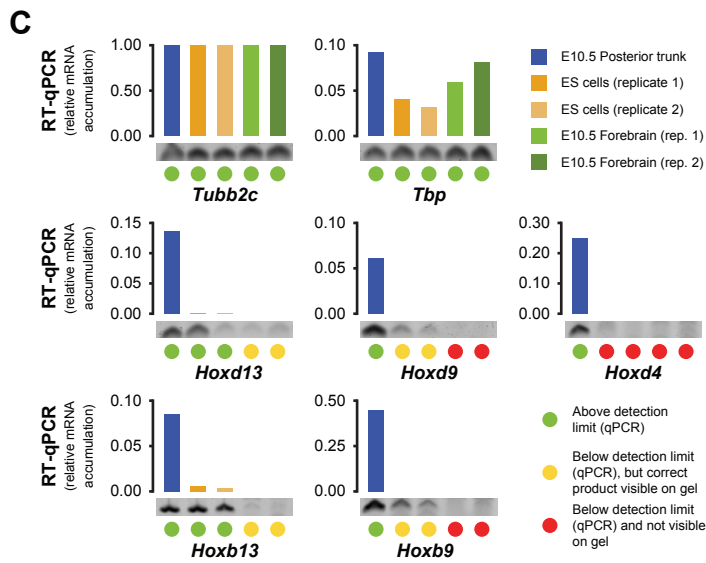

Supplement: supp [file elife-02557-supp-v1.zip › elife_poa_e02557_Figure_1_figure_supplement_7.pdf]

**A**

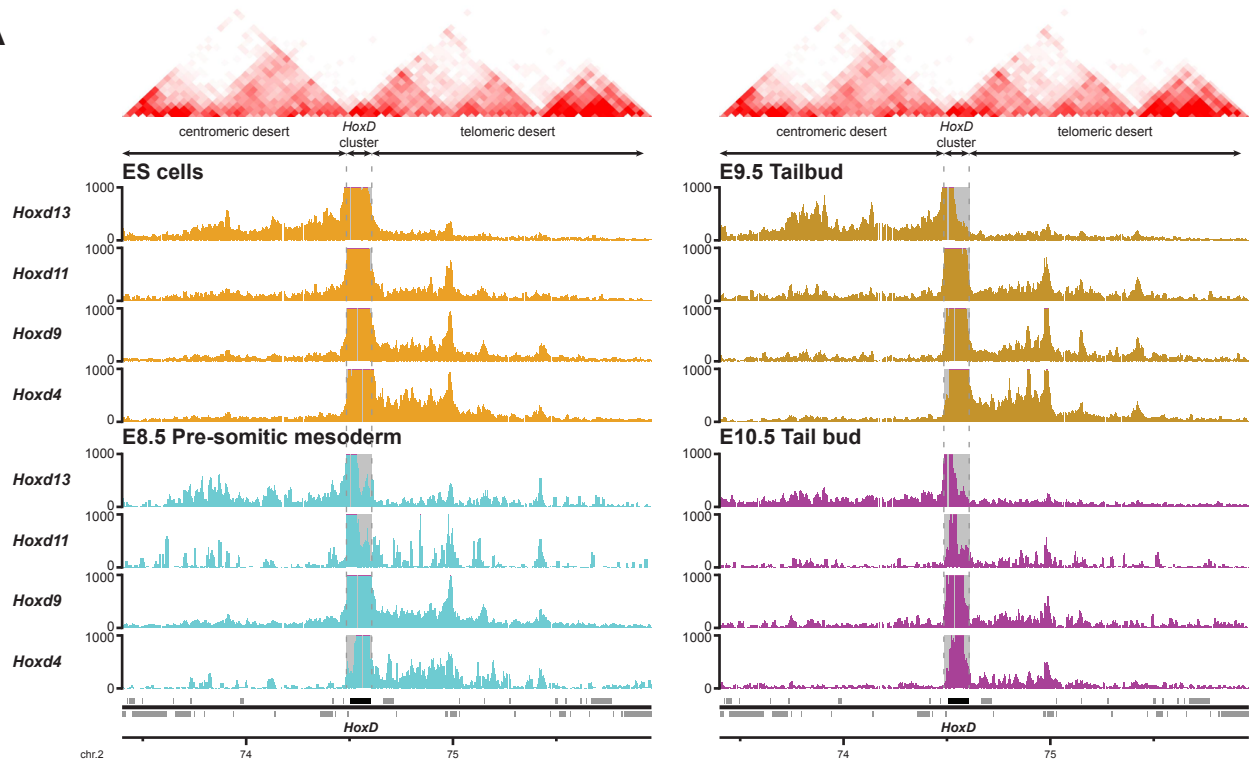

**B**

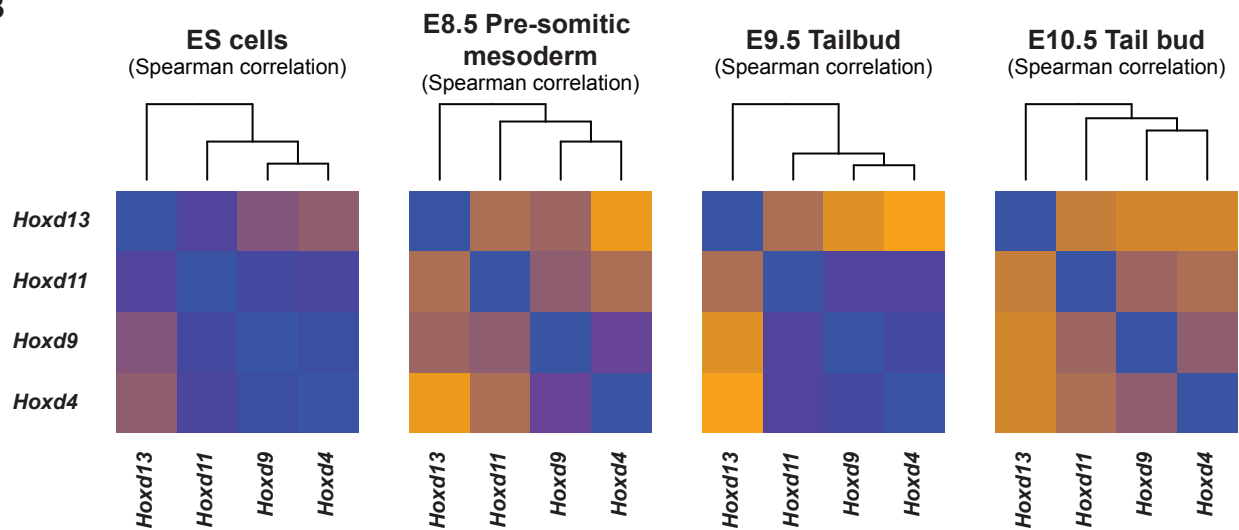

**C**

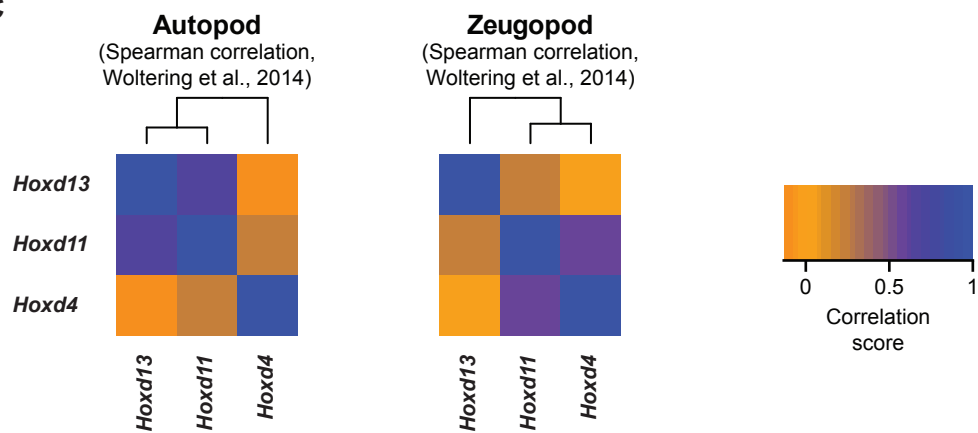

Supplement: supp [file elife-02557-supp-v1.zip › elife_poa_e02557_Figure_5_figure_supplement_1.pdf]

## Hoxb9

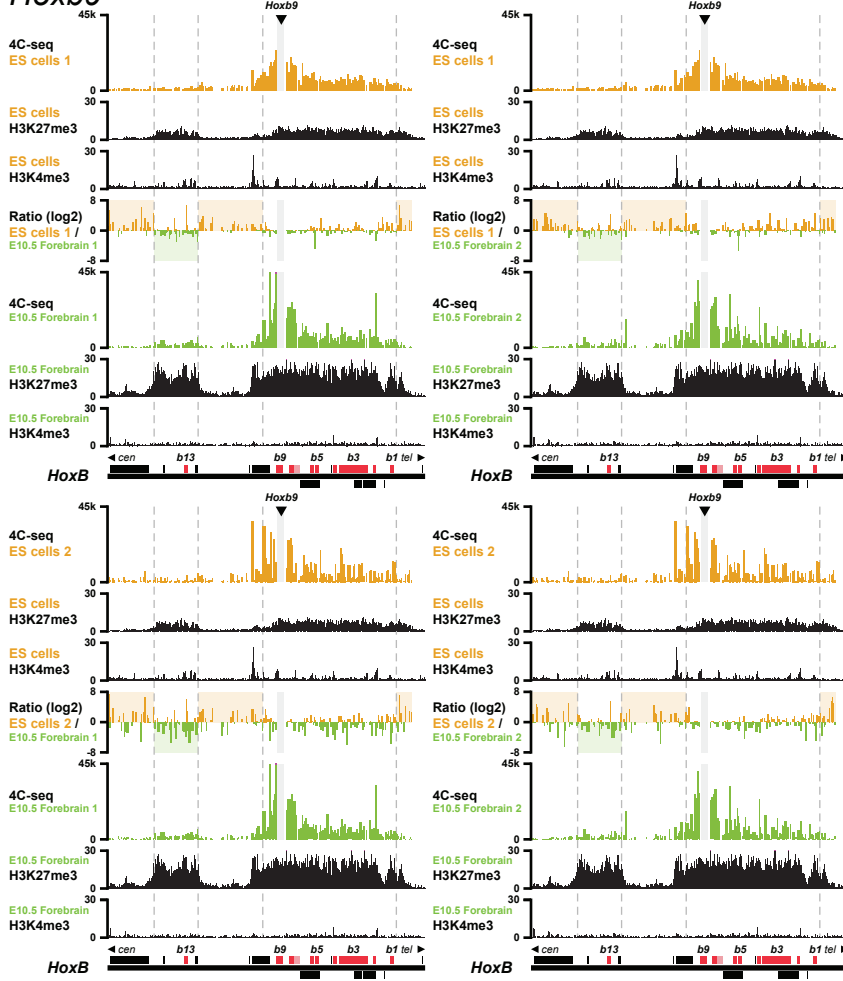

## Controls:

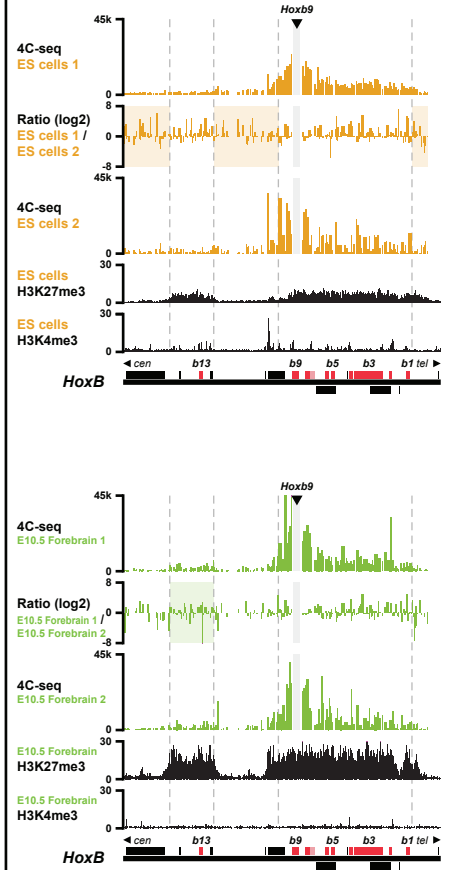

Supplement: supp [file elife-02557-supp-v1.zip › elife_poa_e02557_Figure_1_figure_supplement_3.pdf]

## Hoxc13

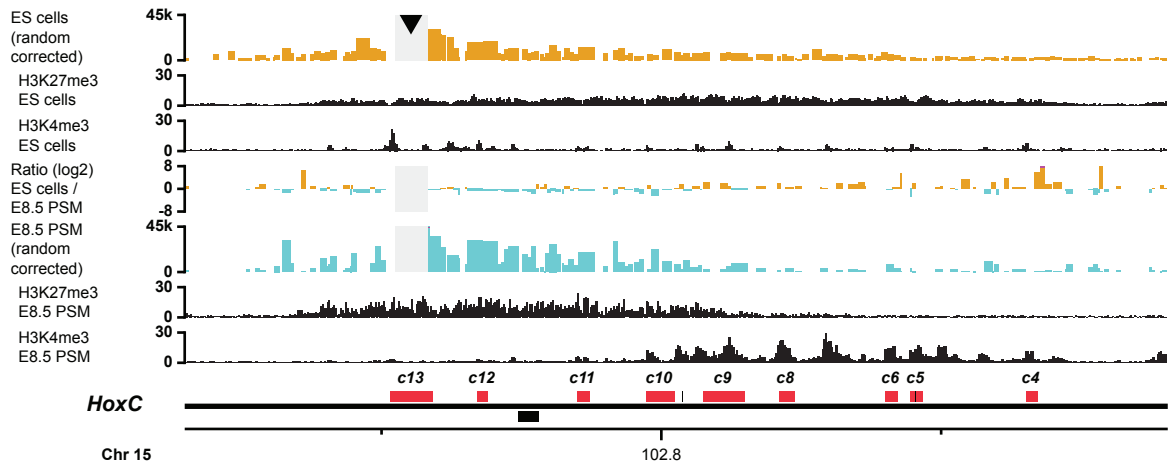

## Hoxb13

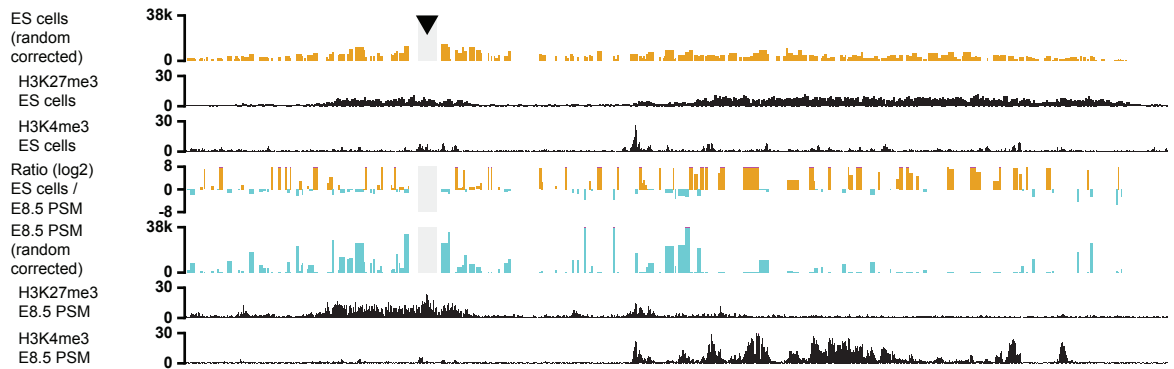

## Hoxb9

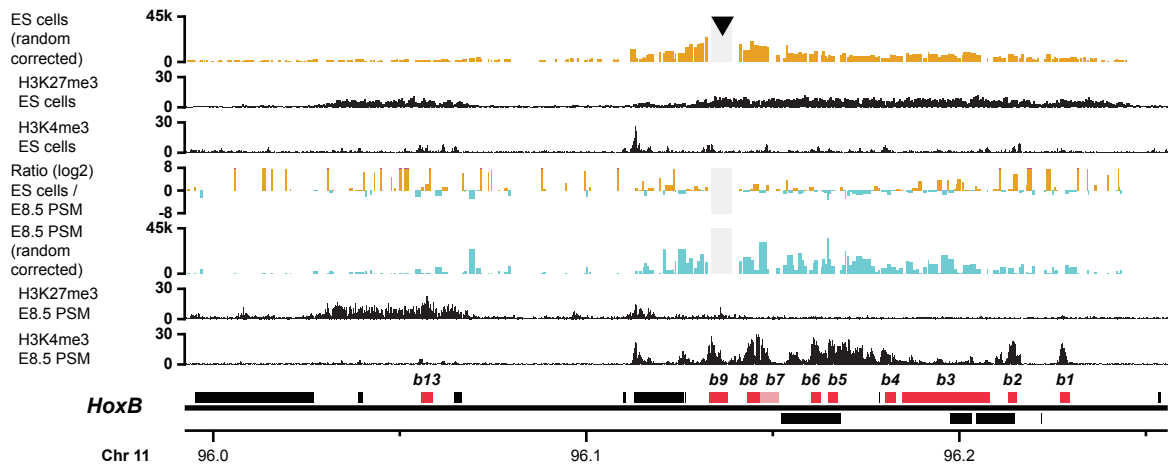

## Hoxa13

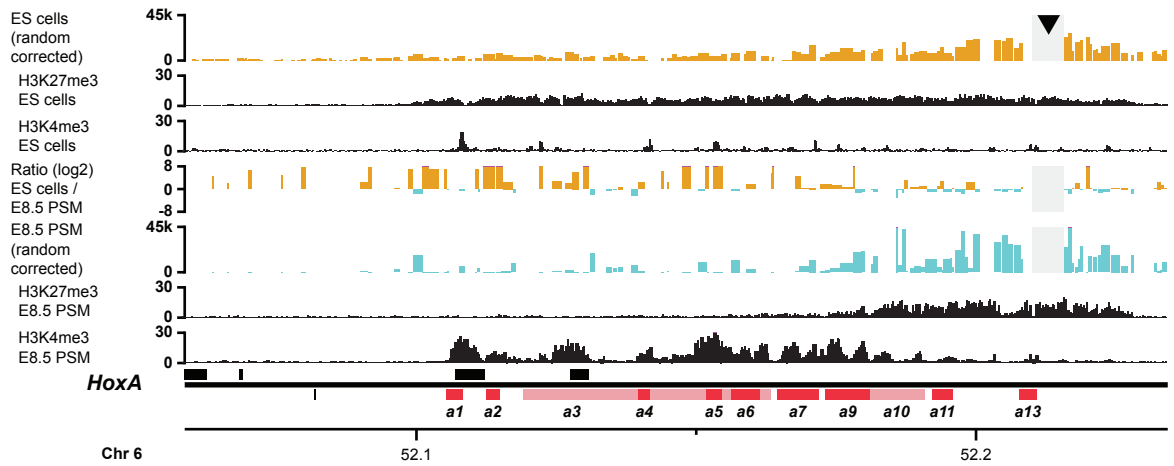

Supplement: supp [file elife-02557-supp-v1.zip › elife_poa_e02557_Figure_2_figure_supplement_2.pdf]
